# Supplementary material for: Light induced in situ post-modification of clay-chromophore hybrids for multiple white light emissions
Source: Royal Society of Chemistry journal article supplement (doi:10.1039/c5tc03319e), 2015-12-15
Supplement: c5tc03319e1.pdf [file c5tc03319e1.pdf]

## Supporting information

### **Light Induced *in-situ* post-modification of clay-chromophore hybrids for multiple white light emissions**

Ankit Jain,<sup>a</sup> Amritroop Achari,<sup>b</sup> Muthuswamy Eswaramoorthy\*<sup>ab</sup> and Subi J. George\*<sup>a</sup>

[a] New Chemistry Unit, Jawaharlal Nehru Centre for Advanced Scientific Research (JNCASR),  
Bangalore, India

[b] Chemistry and Physics Materials Unit, JNCASR, Bangalore, India

*E-mail:* [george@jncasr.ac.in](mailto:george@jncasr.ac.in), [eswar@jncasr.ac.in](mailto:eswar@jncasr.ac.in); *Fax:* +91 80 22082627; *Tel:* +91 80 22082964;

#### Table of Contents:

- A. General Methods
- B. Supporting Figures

### A. General Methods.

- 1. Optical spectroscopy:** UV/Vis absorption and fluorescence spectra were recorded on a Perkin-Elmer Lambda 750 and Perkin-Elmer LS 55 spectrometer respectively.
- 2. Irradiation:** Irradiation was done in a 2x10 mm quartz cuvette. Lamp used was OSRAM puritec germicidal lamp HNS, 8W, G5 (G8T5/OF). In a general procedure the solution was placed inside the lamp chamber directly under the lamp.
- 3. TCSPC:** Steady state PL spectra were collected using the 450 W xenon lamp as the source on the FLSP920 spectrometer, Edinburgh Instruments, while the lifetime measurements were carried out on an EPLED-380 ( $\lambda_{\text{ex}} = 380$  nm) pico second pulsed Light emitting diode.

**B. Supporting figures.**

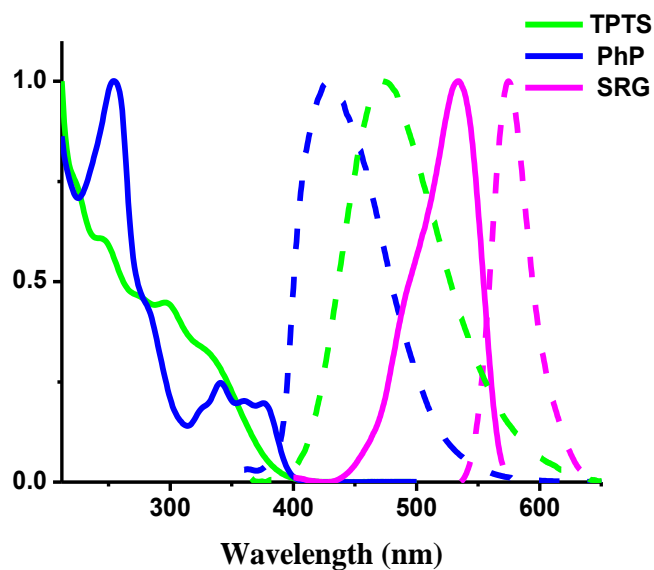

Fig. S1. Absorption (bold) and emission (dash) spectra of **TPTS**, **PhP** and **SRG**.

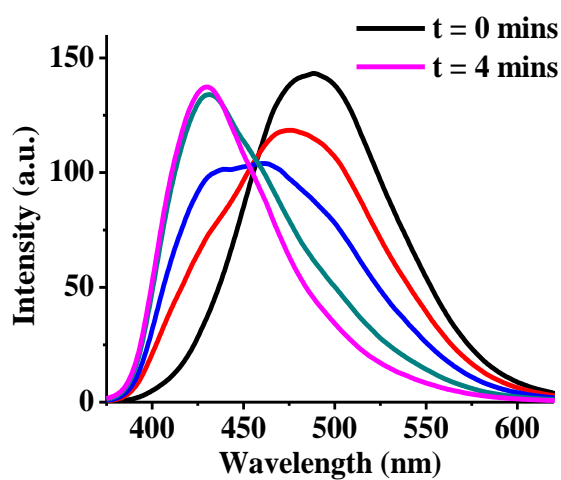

Fig. S2. Emission Spectra of  $10^{-4}$ M **TPTS** with 0.4 wt% **AC** with varying times of 254 nm irradiation ( $\lambda_{\text{exc}} = 330$  nm,  $l = 2$  mm)

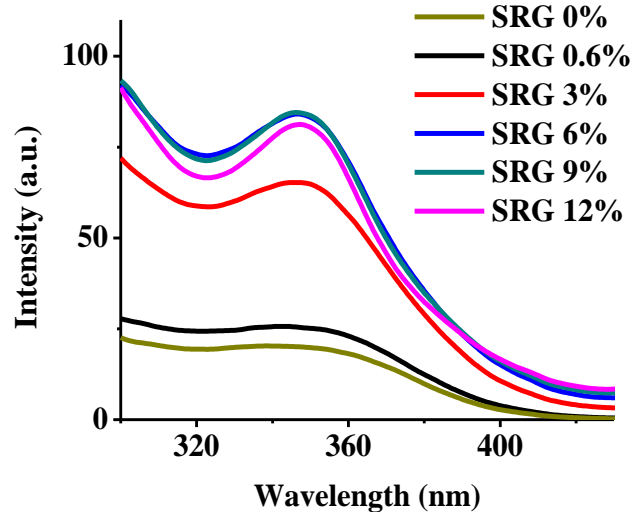

Fig. S3. Excitation Spectra of  $10^{-4}$  M TPTS with 0.4 wt% AC with varying amounts of SRG ( $\lambda_{\text{mon}} = 570$  nm,  $l = 2$  mm)

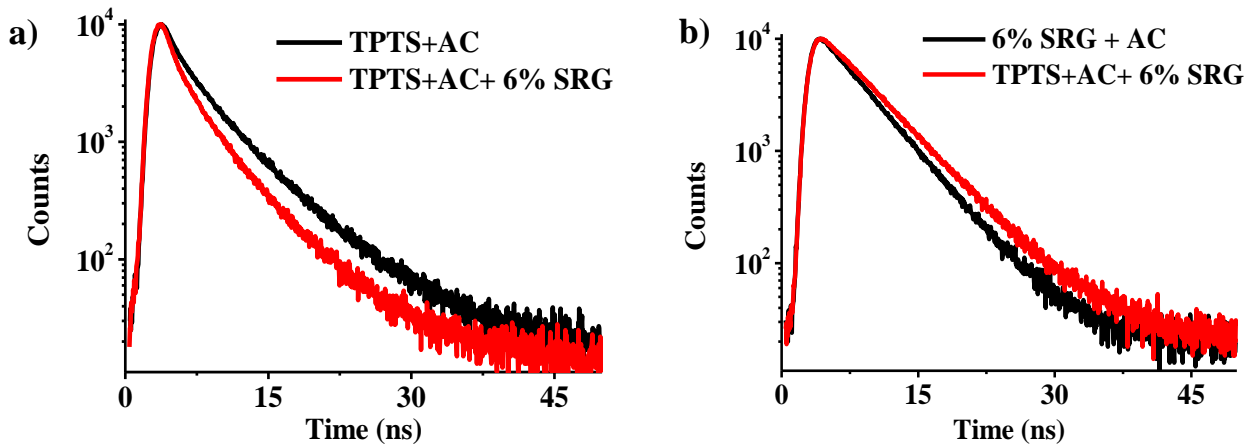

Fig. S4. TCSPC decay profiles of (a)  $10^{-4}$  M TPTS with 0.4 wt% AC compared with  $10^{-4}$  M TPTS with 0.4 wt% AC and 6% SRG and (b) 6% SRG with 0.4 wt% AC compared with  $10^{-4}$  M TPTS with 0.4 wt% AC and 6% SRG ( $\lambda_{\text{mon}} = 474$  and 570 nm respectively,  $\lambda_{\text{exc}} = 380$  nm). Energy transfer efficiency calculated from lifetime is 12.24%

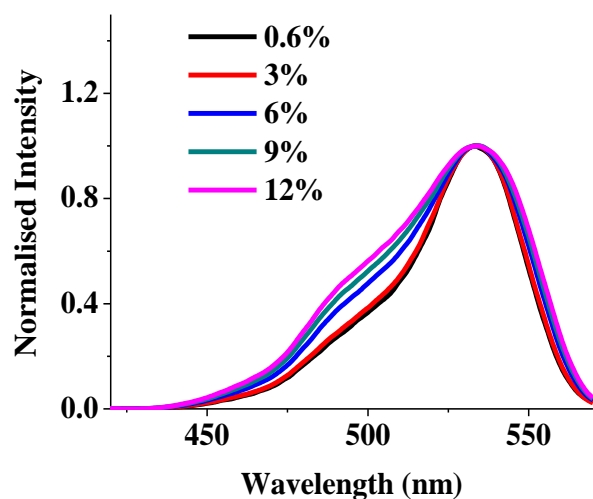

Fig. S5. Excitation Spectra of 0.4 wt% AC with varying amounts of SRG ( $\lambda_{\text{mon}} = 570$  nm,  $l = 2$  mm)

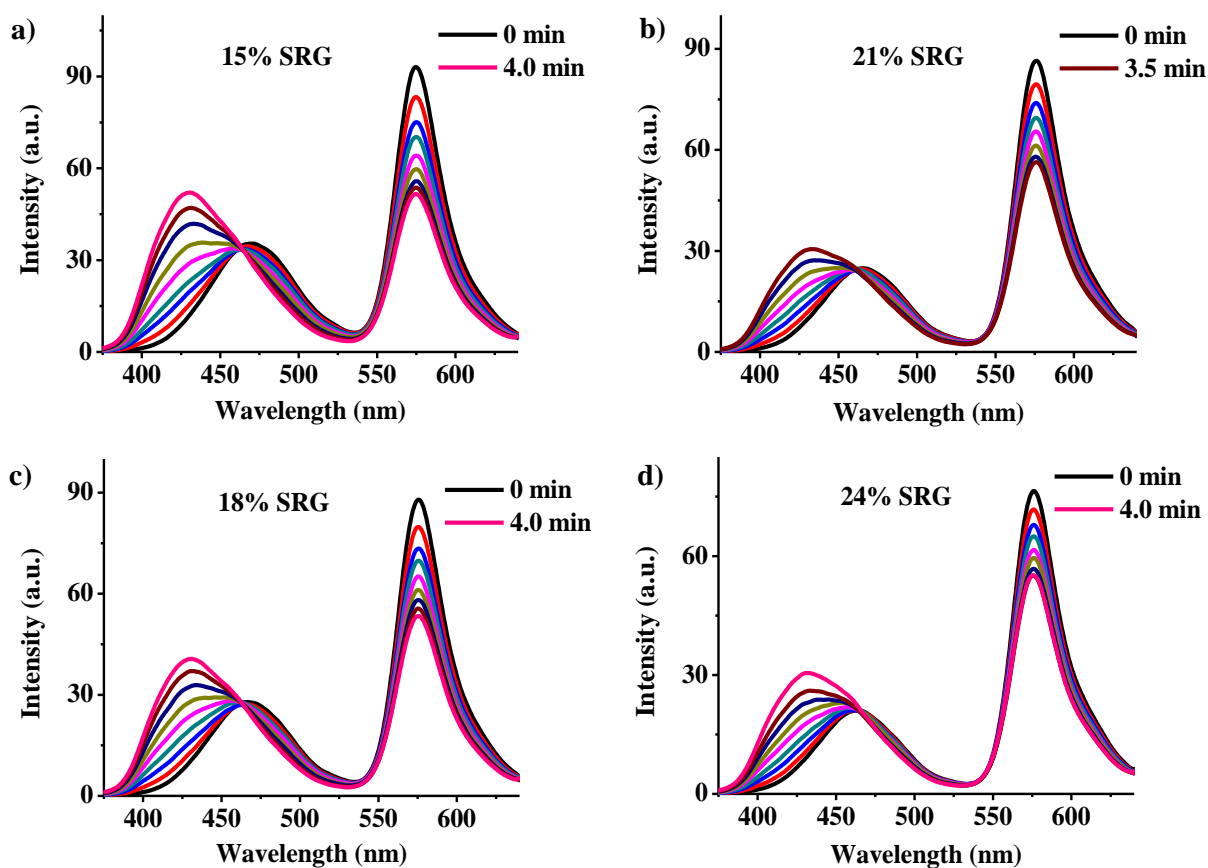

Fig. S6. (a)-(d) Emission Spectra of  $10^{-4}$ M TPTS + 0.4 wt% AC with varying amounts of SRG under varying times of 254 nm irradiation ( $\lambda_{\text{exc}} = 330$  nm,  $l = 2$  mm)

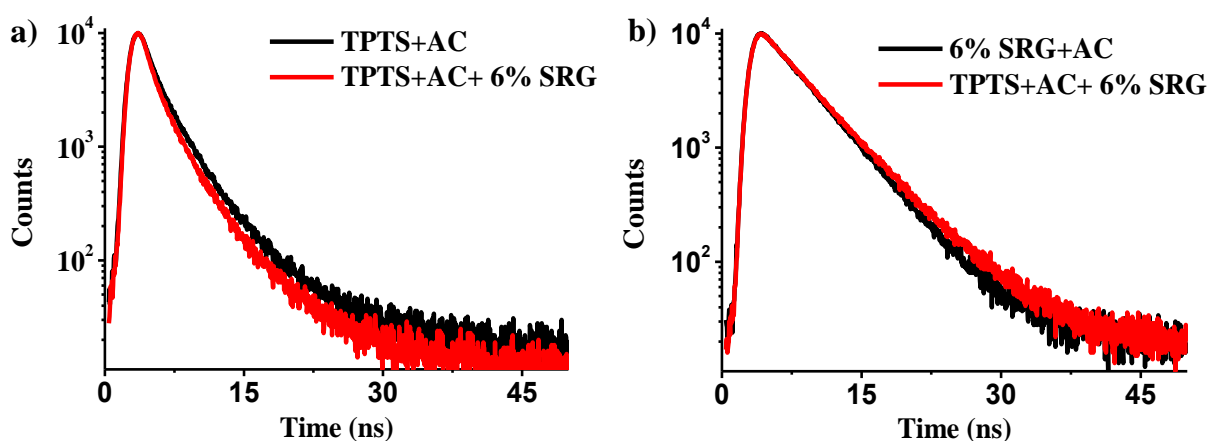

Fig. S7. TCSPC decay profiles of (a)  $10^{-4}$ M TPTS with 0.4 wt% AC (after 4 min of 254 irradiation) compared with  $10^{-4}$ M TPTS with 0.4 wt% AC and 6% SRG (after 4 min of 254 irradiation) and (b) 6% SRG with 0.4 wt% AC compared with  $10^{-4}$ M TPTS with 0.4 wt% AC and 6% SRG (after 4 min of 254 irradiation) ( $\lambda_{\text{mon}} = 410$  and 570 nm respectively,  $\lambda_{\text{exc}} = 380$  nm )

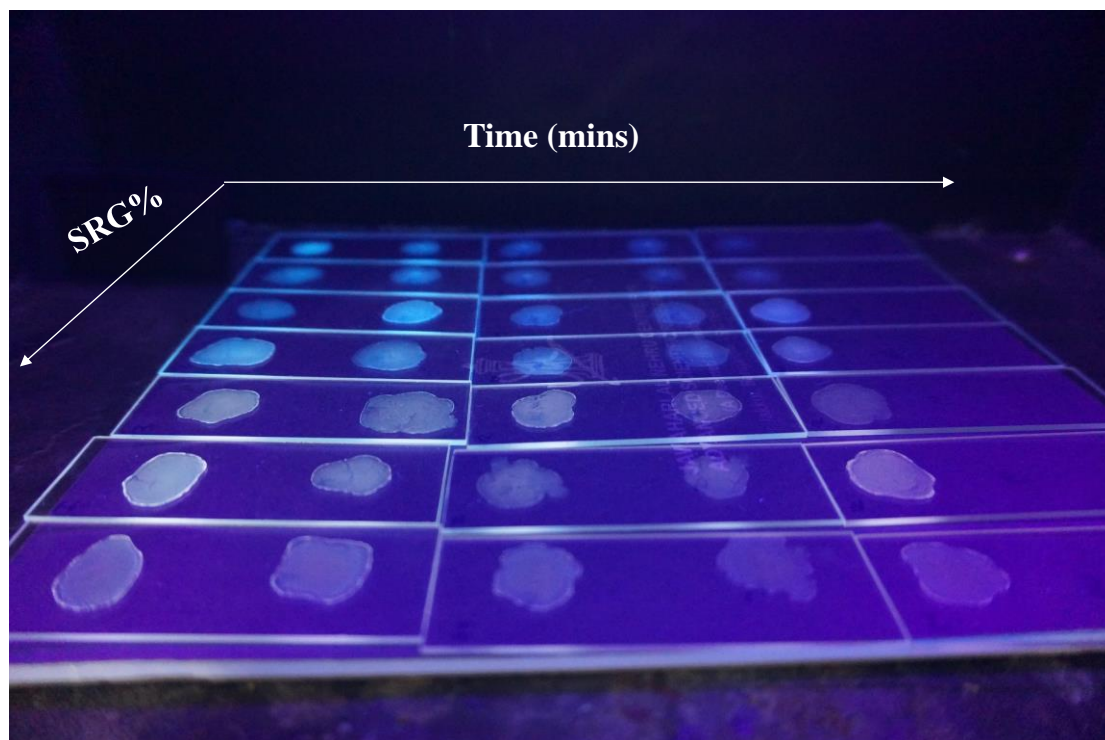

Fig. S8. Photographs under 365 nm illuminations of drop casted films of  $10^{-4}$ M TPTS + 0.4 wt% AC with varying amounts of SRG under varying 254 nm irradiation.

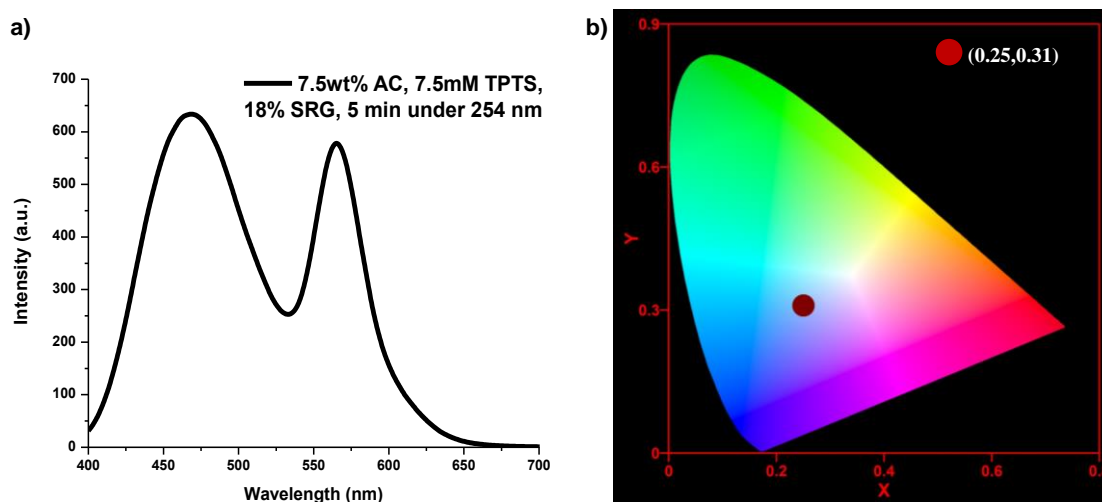

Fig. S9. (a) Emission spectra of a film (7.5 wt% AC, 7.5 mM **TPTS**, 18% **SRG**, 5 min under 254 nm) and (b) the respective CIE co-ordinates. It is worth noting that the two chromophores (**TPTS**, **SRG**) are of opposite nature as **TPTS** increase emission on aggregating and **SRG** decreases (Ref 8a main text). Therefore while making films CIE co-ordinates are not conserved and tend to shift towards the blue. Furthermore a complete reconfiguration of ingredients is required to achieve anything closer to white light. From the many conditions we tried the above mentioned composition and CIE co-ordinates are the closest we could get to a white light. We believe that though the applicability of the general concept is irrefutable, the present set of chromophores is limited by their application on films.

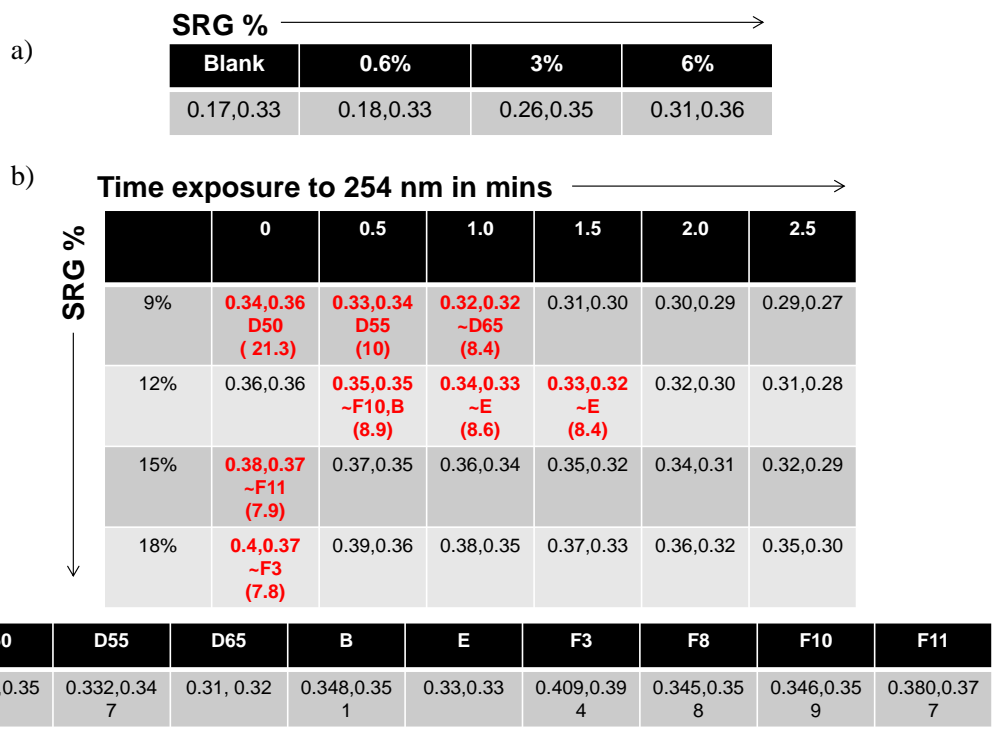

Fig. S10. (a) and (b) 1931 CIE coordinates of  $10^{-4}$ M TPTS + 0.4 wt% AC with varying amounts of SRG under varying 254 nm irradiation (c) Actual 1931 CIE co-ordinates of white light standards. The numbers in parentheses represent fluorescence quantum yield in percentage.



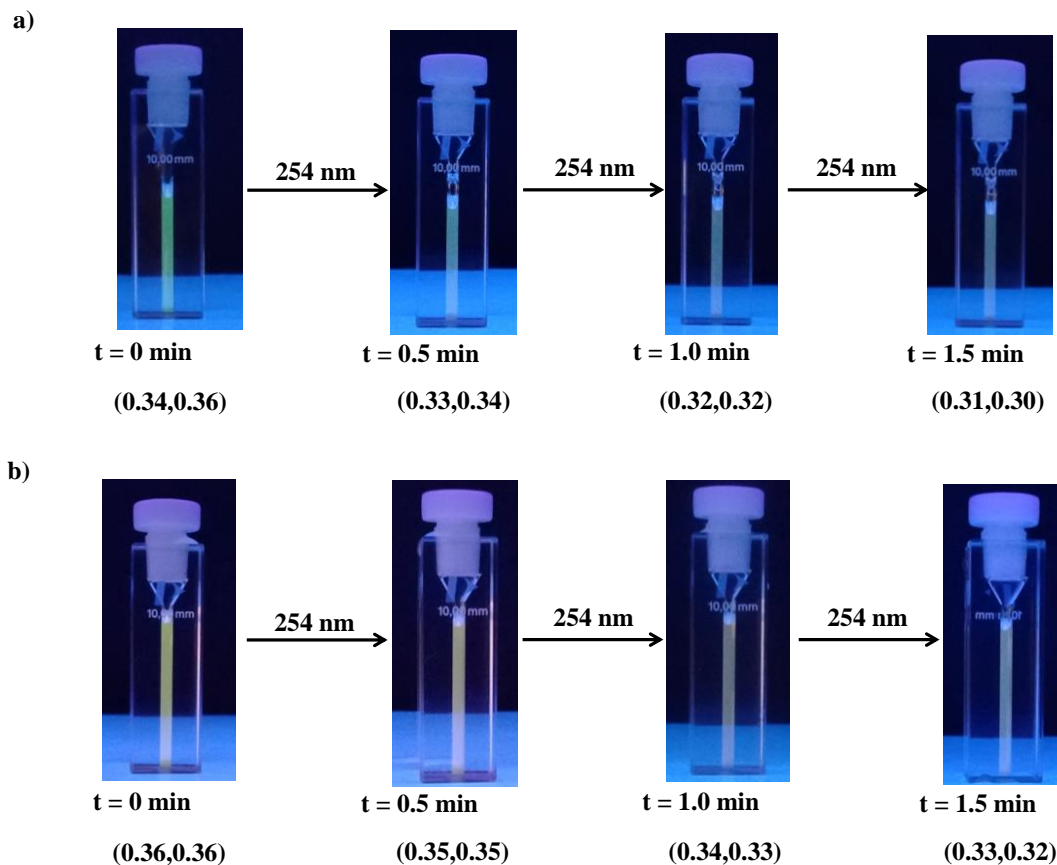

Fig. S11 (a) and (b) Photographs under 365 nm illumination of 254 nm irradiation progression over time of **TPTS+AC** hybrid containing 9% and 12% **SRG** respectively. The 1931 CIE coordinates of the hybrids are mentioned in parentheses

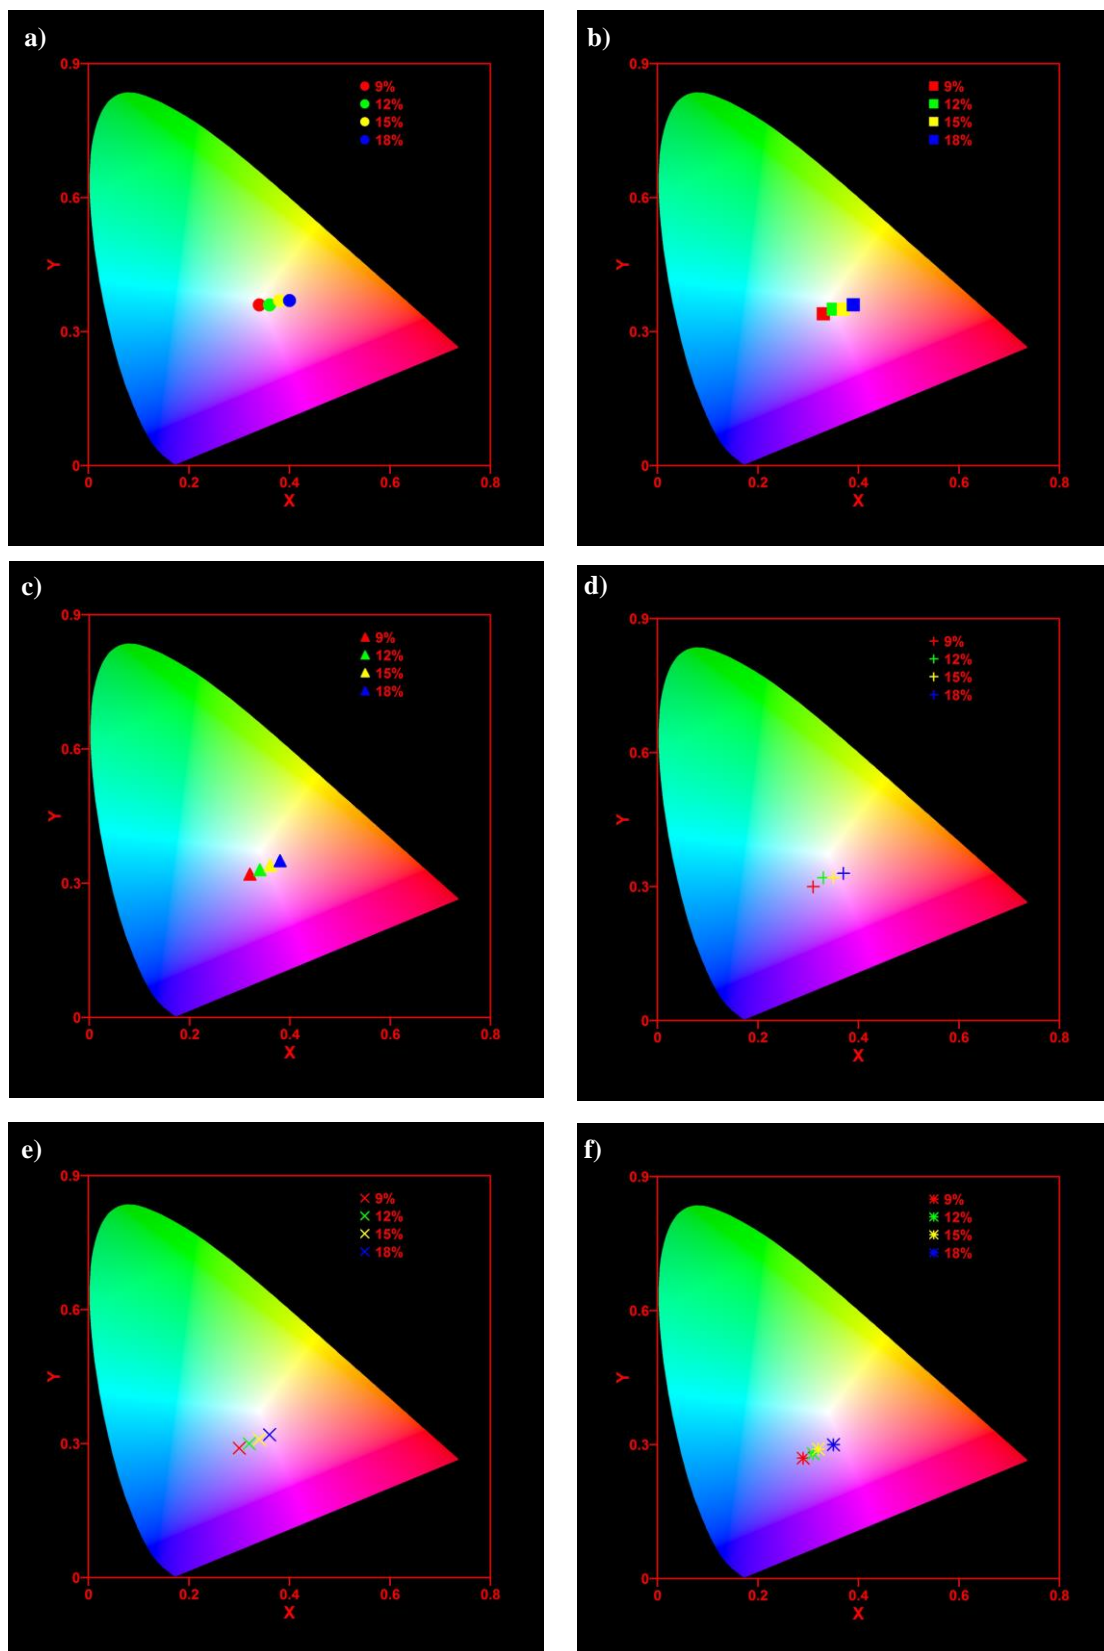

Fig. S12. (a) - (f) 1931 CIE coordinates of  $10^{-4}$ M TPTS + 0.4 wt% AC with varying amounts of SRG under varying 254 nm irradiation (0, 0.5, 1.0, 1.5, 2.0 and 2.5 minutes respectively)

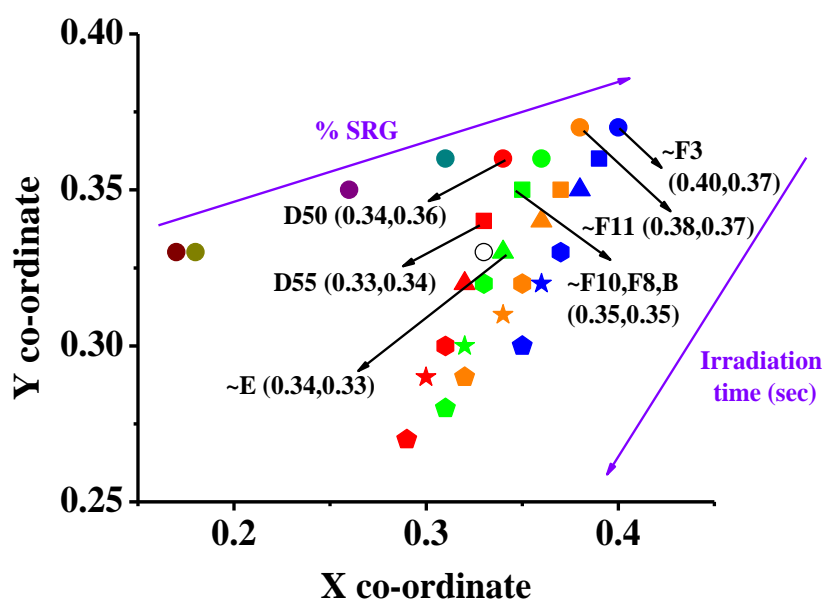

Fig. S13. 1931 CIE coordinates of  $10^{-4}$ M TPTS + 0.4 wt% AC with varying amounts of SRG under varying 254 nm irradiation (0, 0.5, 1.0, 1.5, 2.0 and 2.5 minutes respectively) (same shape of represents same time of irradiation and same color represents same % of SRG)

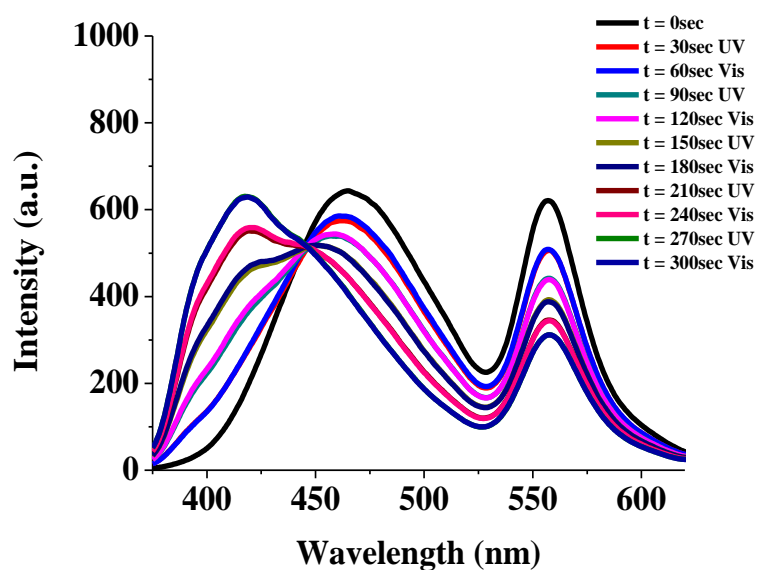

Fig. S14. Emission spectra of 9% SRG with  $10^{-4}$ M TPTS and 0.4 wt% AC with alternate short UV and visible illumination for 30 secs each
